# Supplementary material for: A diverse intrinsic antibiotic resistome from a cave bacterium
Source: PubMed Central journal article supplement (PMC5155152; doi:10.1038/ncomms13803), 2016-12-08
Supplement: ncomms13803-s1.pdf [file ncomms13803-s1.pdf]

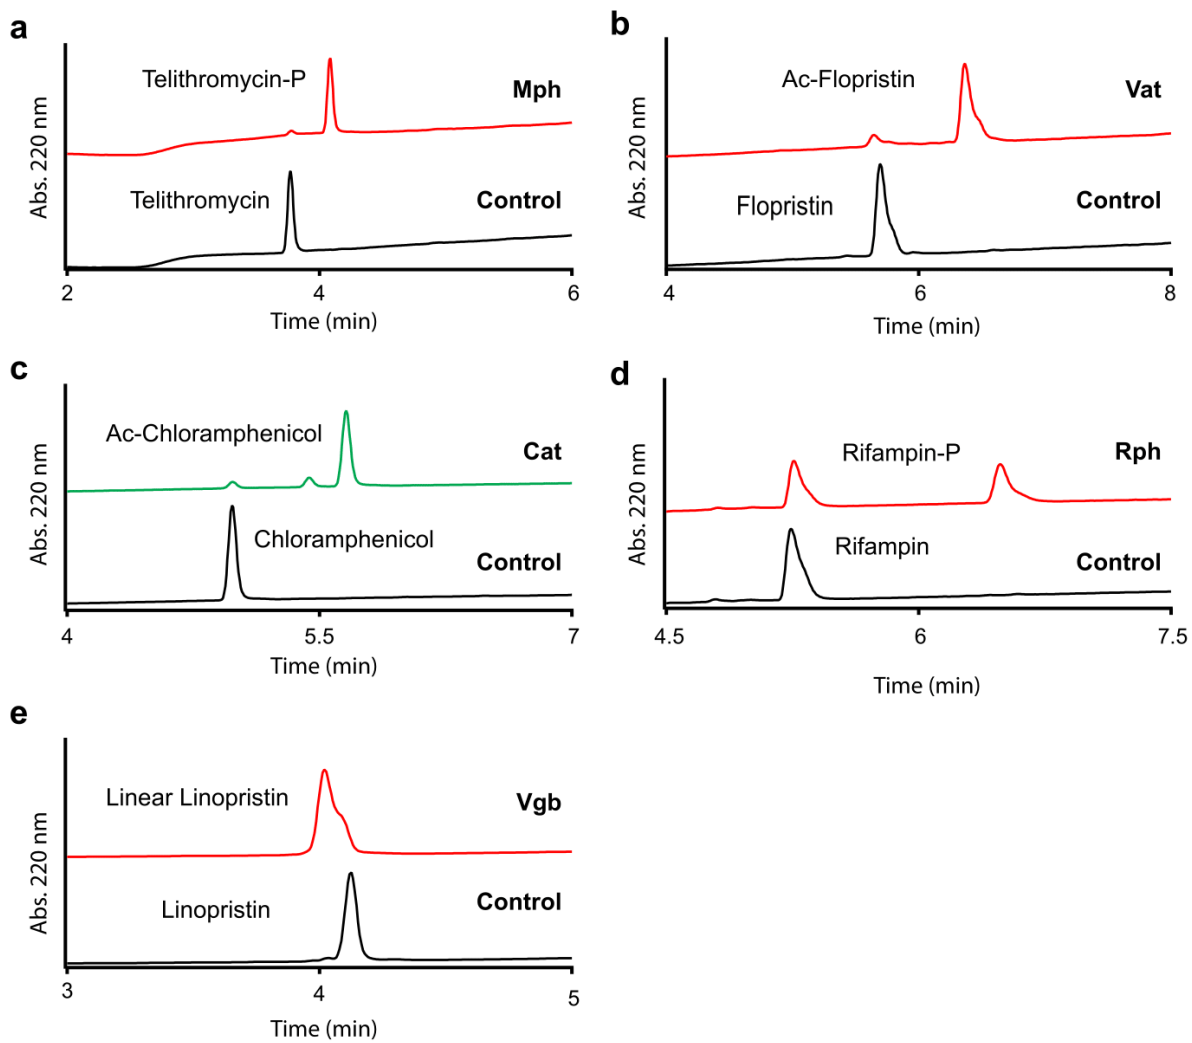

**Supplementary Figure 1:** Functional validation of antibiotic-inactivating enzymes identified in this study. Enzymatic reactions were analyzed using HPLC and confirmed to modify their predicted substrates.

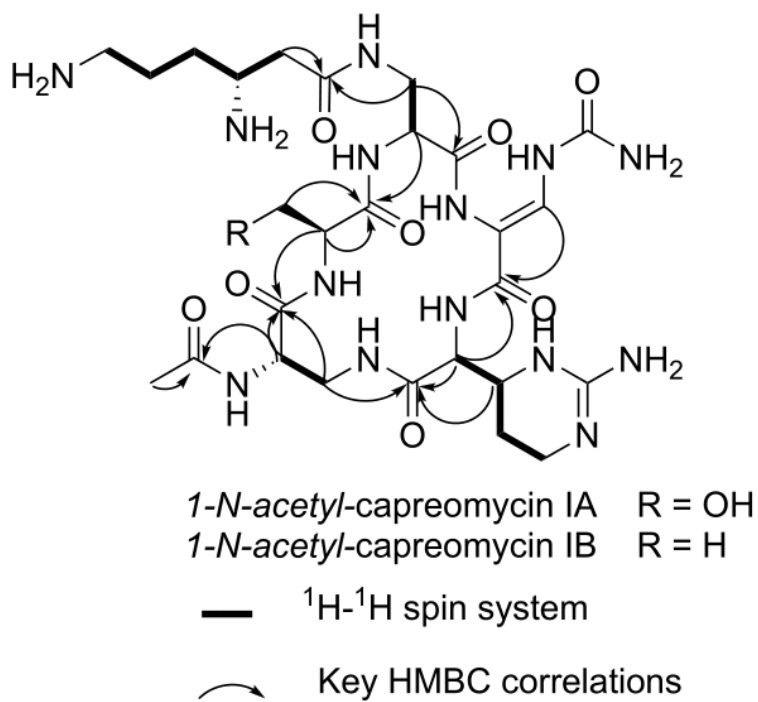

**Supplementary Figure 2:** Key TOCSY, COSY and HMBC correlations of *1-N-acetyl-capreomycin IA* and *1-N-acetyl-capreomycin IB*

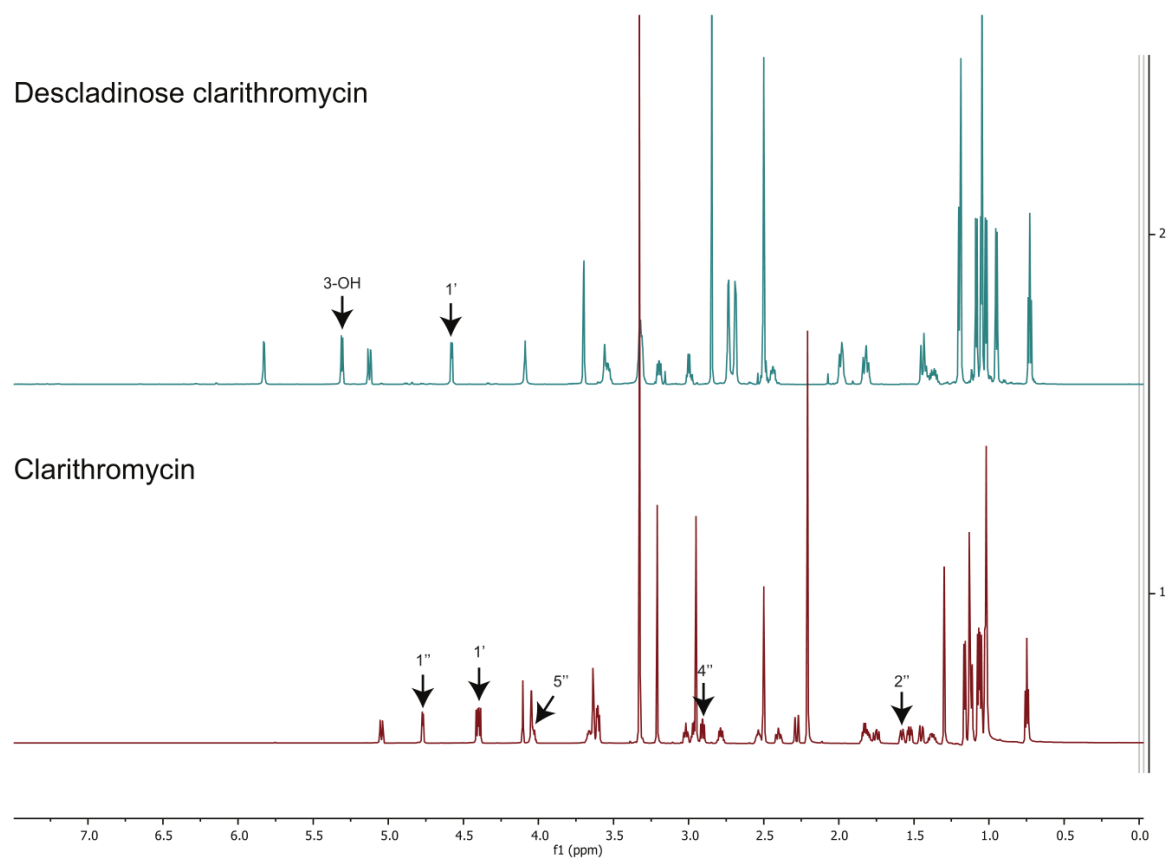

**Supplementary Figure 3:** Comparison of <sup>1</sup>H NMR spectra of clarithromycin and descladinose clarithromycin in DMSO-d<sub>6</sub>.

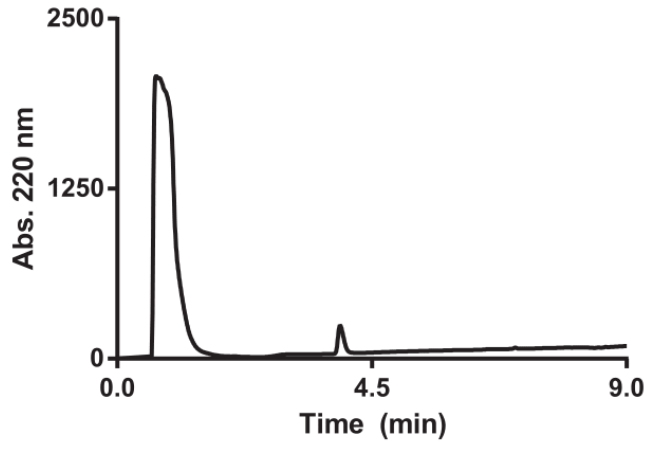

**Supplementary Figure 4:** Descladinose clarithromycin analyzed by HPLC.

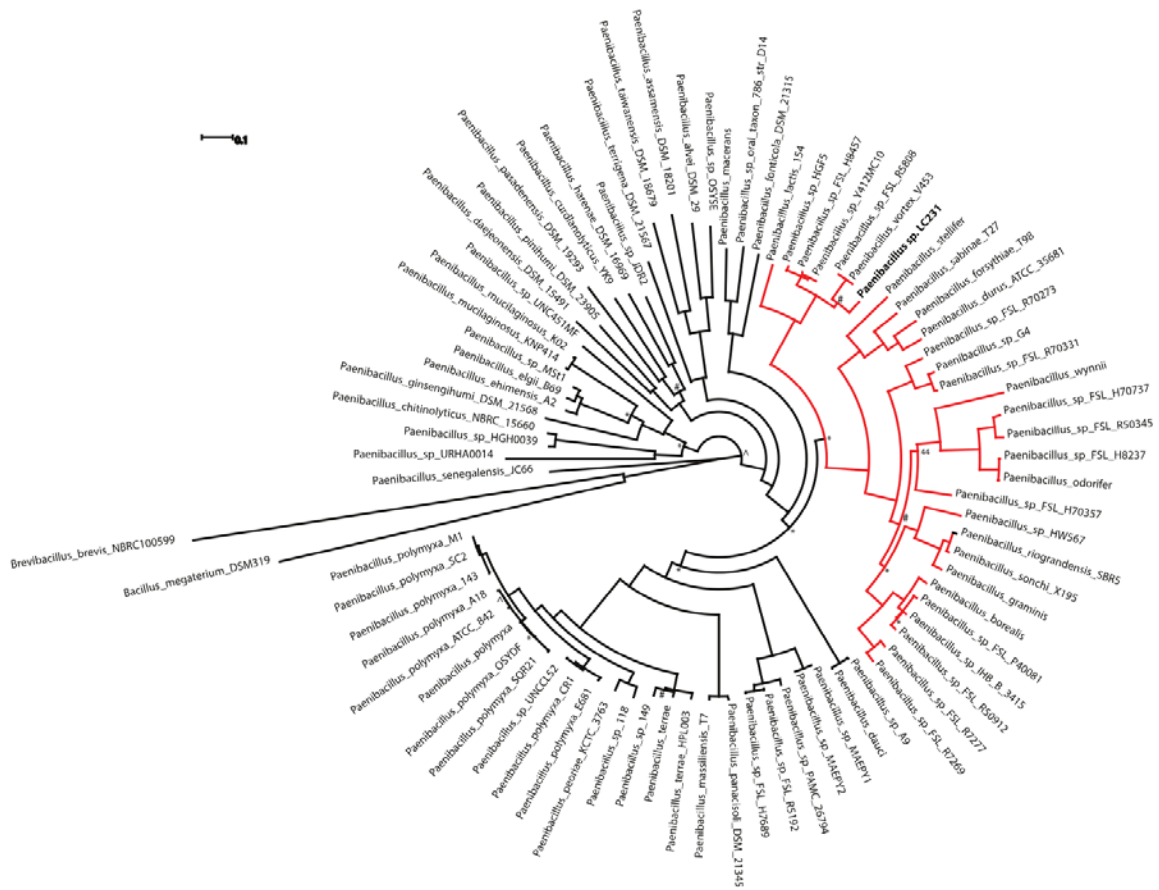

**Supplementary Figure 5:** *Paenibacillus* species tree presented as a circular cladogram. Concatenated maximum-likelihood tree using 10 housekeeping genes (*dnaA*, *gyrB*, *pyrH*, *recA*, *pgi*, *trpB*, *atpD*, *sucC*, *rpoB*, *topA*) derived from *Paenibacillus* genome sequences. The segment highlighted in red was used for the pan-*Paenibacillus* comparison of resistance enzymes. Unless otherwise noted, bootstrap values are 100. The following symbols represent bootstrap values; >80 (\*), >70 (#) and >50 (^).

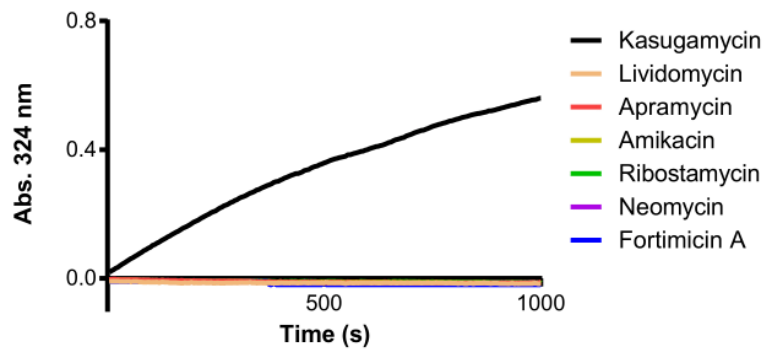

**Supplementary Figure 6:** Substrate specificity of AAC(2')-IIb. AAC(2')-IIb specifically acetylates kasugamycin in an *in vitro* acetyltransferase assay and does not modify other aminoglycosides.

**Supplementary Table 1:** Quantitative antibiogram of *Paenibacillus* sp. LC231, results of antibiotic inactivation assays and resistance gene prediction using the Resistance Gene Identifier (RGI).

| <b>Antibiotic</b> | <b>MIC<br/>(<math>\mu\text{g/mL}</math>)</b> | <b>Antibiotic<br/>Inactivation?</b> | <b>RGI Prediction</b>       | <b>Functional genomics</b> |
|-------------------|----------------------------------------------|-------------------------------------|-----------------------------|----------------------------|
| Meropenem         | 2                                            | No                                  |                             |                            |
| Cefotaxime        | 2                                            | n/a                                 |                             |                            |
| Cephalexin        | $\geq 128$                                   | No                                  |                             |                            |
| Ampicillin        | 8                                            | No                                  |                             |                            |
| Teicoplanin       | 0.25                                         | n/a                                 |                             |                            |
| Vancomycin        | 1                                            | No                                  |                             |                            |
| Bacitracin        | $\geq 128$                                   | <b>Yes</b>                          |                             | <i>bahA</i>                |
| Fosfomicin        | $\geq 128$                                   | No                                  |                             |                            |
| Polymyxin B       | 8                                            | n/a                                 |                             |                            |
| Gramicidin D      | 1                                            | n/a                                 |                             |                            |
| Daptomycin        | 16                                           | <b>Yes</b>                          |                             |                            |
| Rifampin          | 1                                            | <b>Yes</b>                          | <i>rph, rpoB</i> A473T      |                            |
| Novobiocin        | 0.25                                         | n/a                                 |                             |                            |
| Mupirocin         | $\geq 100$                                   | No                                  |                             | <i>ileRS</i>               |
| Tylosin           | 16                                           | <b>Yes</b>                          |                             |                            |
| Spiramycin        | $\geq 128$                                   | <b>Yes</b>                          |                             |                            |
| Telithromycin     | 2                                            | <b>Yes</b>                          |                             |                            |
| Erythromycin      | 2                                            | No                                  | <i>mph</i>                  |                            |
| Azithromycin      | 16                                           | No                                  |                             |                            |
| Clarithromycin    | 0.25                                         | No                                  |                             |                            |
| Linopristin       | 64                                           | <b>Yes</b>                          | <i>vgb</i>                  |                            |
| Clindamycin       | 16                                           | No                                  | <i>clPa (cfr-like)</i>      | <i>llmA</i>                |
| Flopristin        | 32                                           | <b>Yes</b>                          | <i>clPa (cfr-like), vat</i> |                            |
| Tiamulin          | 32                                           | No                                  | <i>clPa (cfr-like)</i>      | <i>taeA</i>                |
| Neomycin          | 2                                            | n/a                                 | <i>ant(4')-I</i>            | <i>aac(6')</i>             |
| Gentamicin        | 2                                            | n/a                                 | <i>ant(4')-I</i>            | <i>aac(6')</i>             |
| Apramycin         | 8                                            | n/a                                 |                             |                            |
| Amikacin          | 16                                           | n/a                                 |                             | <i>aac(6')</i>             |
| Tobramycin        | 32                                           | No                                  | <i>ant(4')-I</i>            | <i>aac(6')</i>             |
| Spectinomycin     | $\geq 128$                                   | n/a                                 |                             |                            |
| Kasugamycin       | $\geq 128$                                   | No                                  |                             | <i>aac(2')-IIa</i>         |
| Kanamycin         | $\geq 128$                                   | No                                  | <i>ant(4')-I</i>            | <i>aac(6')</i>             |
| Streptomycin      | $\geq 128$                                   | No                                  | <i>aadK, aph(3'')-I</i>     |                            |
| Linezolid         | 1                                            | n/a                                 | <i>cfr</i>                  |                            |
| Tetracycline      | $\geq 128$                                   | No                                  |                             | <i>tetAB(48)</i>           |
| Capreomycin       | 32                                           | No                                  |                             | <i>cpaA</i>                |
| Thiostrepton      | 0.25                                         | No                                  |                             |                            |
| Chloramphenicol   | 32                                           | <b>Yes</b>                          | <i>cat</i>                  |                            |
| Fusidic acid      | 8                                            | No                                  |                             |                            |
| Factumycin        | 16                                           | n/a                                 |                             |                            |
| Nalidixic acid    | 4                                            | n/a                                 |                             |                            |
| Ciprofloxacin     | 0.25                                         | n/a                                 |                             |                            |
| Levofloxacin      | 0.25                                         | n/a                                 |                             |                            |

**Supplementary Table 2:** Quantitative antibiograms of *Staphylococcus aureus* RN4220, *Kocuria rhizophila*, and *Paenibacillus lautus* ATCC 43898. Value units are  $\mu\text{g/mL}$ .

| <b>Antibiotic</b> | <b><i>Paenibacillus lautus</i> ATCC 43898</b><br>MIC ( $\mu\text{g/mL}$ ) | <b><i>S. aureus</i> RN4220</b><br>MIC ( $\mu\text{g/mL}$ ) | <b><i>K. rhizophila</i> MIC</b><br>( $\mu\text{g/mL}$ ) |
|-------------------|---------------------------------------------------------------------------|------------------------------------------------------------|---------------------------------------------------------|
| Meropenem         | 2                                                                         | 0.06                                                       | 0.06                                                    |
| Cefotaxime        | 2                                                                         | 1                                                          | 0.03                                                    |
| Cephalexin        | 64                                                                        | 2                                                          | 0.03                                                    |
| Ampicillin        | 4                                                                         | 0.5                                                        | 0.02                                                    |
| Teicoplanin       | 0.25                                                                      | 1                                                          | 2                                                       |
| Vancomycin        | 0.5                                                                       | 1                                                          | 0.5                                                     |
| Bacitracin        | $\geq 128$                                                                | 16                                                         | 1                                                       |
| Fosfomicin        | $\geq 128$                                                                | 1                                                          | 2                                                       |
| Polymyxin B       | 2                                                                         | 32                                                         | 32                                                      |
| Gramicidin D      | 32                                                                        | 8                                                          | 1                                                       |
| Daptomycin        | 4                                                                         | 2                                                          | 0.25                                                    |
| Rifampin          | 2                                                                         | 0.02                                                       | 0.02                                                    |
| Novobiocin        | 0.25                                                                      | 0.25                                                       | 0.25                                                    |
| Mupirocin         | $\geq 100$                                                                | 0.2                                                        | 100                                                     |
| Tylosin           | 8                                                                         | 1                                                          | 0.125                                                   |
| Spiramycin        | 32                                                                        | 2                                                          | 0.25                                                    |
| Telithromycin     | 0.5                                                                       | 0.06                                                       | 0.02                                                    |
| Erythromycin      | 0.5                                                                       | 0.25                                                       | 0.03                                                    |
| Azithromycin      | 4                                                                         | 0.5                                                        | 0.06                                                    |
| Clarithromycin    | 0.125                                                                     | 0.125                                                      | 0.02                                                    |
| Fusidic acid      | 2                                                                         | 0.125                                                      | 0.5                                                     |
| Linopristin       | 32                                                                        | 4                                                          | 4                                                       |
| Clindamycin       | 8                                                                         | 0.125                                                      | 0.125                                                   |
| Flopristin        | 64                                                                        | 0.02                                                       | 0.02                                                    |
| Neomycin          | 0.5                                                                       | 1                                                          | 0.5                                                     |
| Gentamicin        | 2                                                                         | 1                                                          | 1                                                       |
| Apramycin         | 16                                                                        | 2                                                          | 16                                                      |
| Amikacin          | 16                                                                        | 4                                                          | 2                                                       |
| Tobramycin        | 16                                                                        | 0.5                                                        | 4                                                       |
| Spectinomycin     | $\geq 128$                                                                | 32                                                         | 32                                                      |
| Kasugamycin       | $\geq 128$                                                                | 128                                                        | 128                                                     |
| Kanamycin         | 64                                                                        | 2                                                          | 4                                                       |
| Streptomycin      | $\geq 128$                                                                | 8                                                          | 32                                                      |
| Linezolid         | 1                                                                         | 0.5                                                        | 0.5                                                     |
| Tetracycline      | 8                                                                         | 0.25                                                       | 1                                                       |
| Capreomycin       | 32                                                                        | 256                                                        | 256                                                     |
| Thiostrepton      | 0.5                                                                       | 0.25                                                       | 0.25                                                    |
| Chloramphenicol   | 32                                                                        | 2                                                          | 0.5                                                     |
| Factumycin        | 16                                                                        | 32                                                         | 1.25                                                    |
| Tiamulin          | 128                                                                       | 0.5                                                        | 0.125                                                   |
| Ciprofloxacin     | 0.25                                                                      | -                                                          | -                                                       |
| Levofloxacin      | 0.25                                                                      | -                                                          | -                                                       |
| Nalidixic acid    | 4                                                                         | -                                                          | -                                                       |



**Supplementary Table 3:** Comparison of antibiotic resistance determinants with their closest ortholog and results from RGI prediction of the *Paenibacillus* sp. LC231 genome.

| Resistance Enzyme | Closest relative <sup>a</sup> (% ID)   | Host                            | Location       | RGI results (e-value) <sup>b</sup> |
|-------------------|----------------------------------------|---------------------------------|----------------|------------------------------------|
| AAC(2')-IIb       | AAC(2')-IIa (31%)                      | <i>Acidovorax avenae</i>        | Mobile element | No hit                             |
| AAC(6')-34        | AAC(6')-Im (39.8%)                     | <i>Enterococcus faecium</i>     | Mobile element | No hit                             |
| CpaA              | None                                   |                                 |                | -                                  |
| VatI              | VatG (64.3%)                           | <i>Enterococcus faecium</i>     | Mobile element | $8.19 \times 10^{-100}$            |
| VgbC              | VgbA (58.6%)                           | <i>Staphylococcus aureus</i>    | Mobile element | $5.27 \times 10^{-126}$            |
| CatU              | CatQ (53.4%)                           | <i>Clostridium perfringens</i>  | Chromosome     | $3.19 \times 10^{-74}$             |
| MphI              | MphB (42.6%)                           | <i>E. coli</i>                  | Mobile element | $4.12 \times 10^{-94}$             |
| RphB              | RphWAC4747 (56.3%)                     | <i>Streptomyces</i> sp. WAC4747 | Chromosome     | 0                                  |
| IleRS             | MupB (49.9%)                           | <i>Staphylococcus aureus</i>    | Mobile element | No hit                             |
| BahA              | None                                   |                                 |                | -                                  |
| LlmA              | None                                   |                                 |                | -                                  |
| TetAB(48)         | DrrA (55.2%) DrrB (43.0%) <sup>c</sup> | <i>Streptomyces peucetius</i>   | Chromosome     | No hit                             |
| TaeA              | None                                   |                                 |                | -                                  |

a- Percent identity is from pair-wise comparison of protein sequences.

b- An e-value of  $< 1.0 \times 10^{-50}$  was required in order to be considered a hit.

c- The substrate of DrrAB is daunorubicin and doxorubicin and is not known to export tetracyclines.

**Supplementary Table 4:** Mass characterization of antibiotics modified by resistance enzymes

| Resistance enzyme | Antibiotic      | Mechanism            | Mode     | m/z (substrate) | m/z (product) | Mass difference |
|-------------------|-----------------|----------------------|----------|-----------------|---------------|-----------------|
| AAC(2')-IIb       | Kasugamycin     | Acetylation          | Positive | 380.3           | 422.2         | 41.9            |
| AAC(6')-34        | Sisomicin       | Acetylation          | Positive | 448.4           | 490.3         | 41.9            |
| CpaA              | Capreomycin IA  | Acetylation          | Positive | 669.4           | 711.4         | 42.0            |
| VatI              | Flopristin      | Acetylation          | Positive | 532.4           | 574.3         | 41.9            |
| VgbC              | Linopristin     | $\beta$ -elimination | Negative | 948.6           | 948.6         | 0.0             |
| CatU              | Chloramphenicol | Acetylation          | Negative | 320.9           | 363.0         | 42.1            |
| MphI              | Telithromycin   | Phosphorylation      | Positive | 812.6           | 892.7         | 80.1            |
| RphB              | Rifampin        | Phosphorylation      | Positive | 823.1           | 903.1         | 80.0            |
| BahA              | Bacitracin      | Amidohydrolysis      | Positive | 1422.7572       | 1423.7416     | 0.9844          |

**Supplementary Table 5:** Tandem mass spectrometry analysis of bacitracin and inactivated bacitracin.

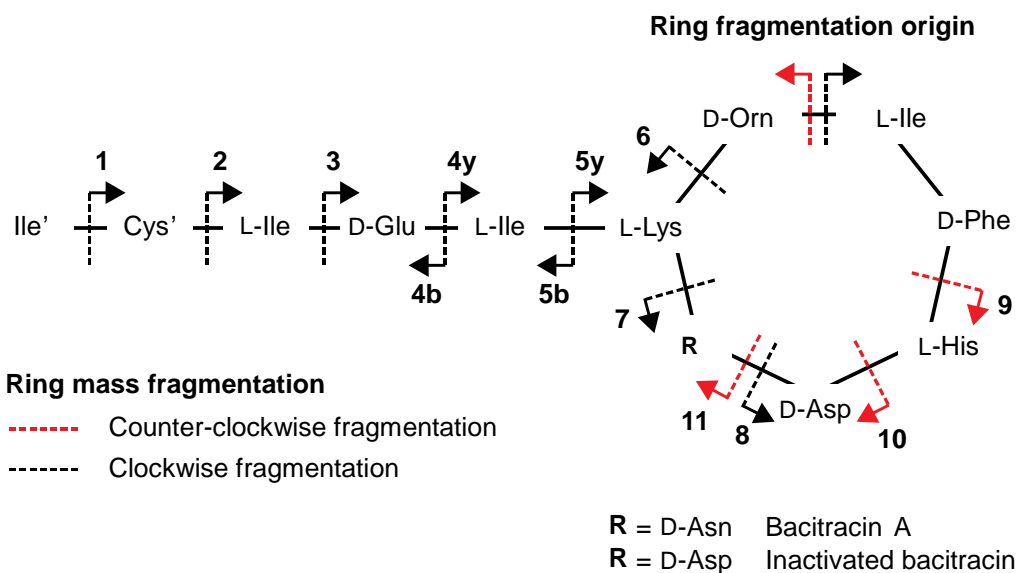

| <b>Ion</b>                   | <b>Bacitracin</b> | <b>Inactivated bacitracin</b> | <b><math>\delta</math> mass</b> |
|------------------------------|-------------------|-------------------------------|---------------------------------|
| Intact                       | 1422.7642         | 1423.7486                     | 0.9844                          |
| <b>MS<sup>2</sup></b>        |                   |                               |                                 |
| 1                            | 1337.53           | 1338.52                       | 0.99                            |
| 2                            | 1224.62           | 1225.56                       | 0.94                            |
| 3                            | 1111.53           | 1112.50                       | 0.97                            |
| 4y                           | 982.55            | 983.50                        | 0.95                            |
| 4b                           | 441.19            | 441.20                        | 0.01                            |
| 5y (ring)                    | 869.46            | 870.44                        | 0.98                            |
| 5b                           | 554.39            | 554.40                        | 0.01                            |
| <b>MS<sup>3</sup> (ring)</b> |                   |                               |                                 |
| 6                            | 754.47            | 755.46                        | 0.99                            |
| 7                            | 627.28            | 628.26                        | 0.98                            |
| 8                            | 513.41            | 513.40                        | -0.01                           |
| 9                            | 609.38            | 610.38                        | 1.00                            |
| 10                           | 472.41            | 473.37                        | 0.96                            |
| 11                           | 357.38            | 358.42                        | 1.04                            |

**Supplementary Table 6:** Steady-state kinetics of antibiotic-modifying enzymes.

| <b>Enzyme</b> | <b>Substrate</b> | <b>K<sub>m</sub> (μM)</b> | <b>k<sub>cat</sub> (s<sup>-1</sup>)</b> | <b>K<sub>i</sub> (μM)</b> | <b>k<sub>cat</sub>/K<sub>m</sub>(s<sup>-1</sup>M<sup>-1</sup>)</b> |
|---------------|------------------|---------------------------|-----------------------------------------|---------------------------|--------------------------------------------------------------------|
| CatU          | Chloramphenicol  | 50 ± 3                    | -                                       | -                         | -                                                                  |
|               | Acetyl-CoA       | 400 ± 20                  | 94 ± 2                                  |                           | 2.3 × 10 <sup>5</sup>                                              |
| VgbC          | Linopristin      | 4.8 ± 1.4                 | 1.2 ± 0.08                              |                           | 2.5 × 10 <sup>5</sup>                                              |
| MphI          | Tylosin          | 2.9 ± 0.9                 | 0.29 ± 0.01                             |                           | 1.0 × 10 <sup>5</sup>                                              |
|               | Spiramycin       | 24.4 ± 6.8                | 1.2 ± 0.1                               | 475 ± 161                 | 4.9 × 10 <sup>4</sup>                                              |
|               | Telithromycin    | 8.3 ± 1.6                 | 0.45 ± 0.02                             |                           | 5.2 × 10 <sup>4</sup>                                              |
|               | GTP              | 10.0 ± 1.8                | 0.40 ± 0.01                             |                           | 4.0 × 10 <sup>4</sup>                                              |
| CpaA          | Capreomycin      | 0.76 ± 0.12               | 0.51 ± 0.04                             | 23 ± 7                    | 6.8 × 10 <sup>5</sup>                                              |
|               | Acetyl-CoA       | 39 ± 3                    | 0.49 ± 0.01                             |                           | 1.3 × 10 <sup>4</sup>                                              |
| VatI          | Linopristin      | 4.8 ± 0.5                 | 3.10 ± 0.10                             |                           | 6.4 × 10 <sup>5</sup>                                              |
|               | Acetyl-CoA       | 48 ± 3                    | 4.1 ± 0.1                               |                           | 8.6 × 10 <sup>4</sup>                                              |
| RphB          | Rifampin         | 0.44 ± 0.13               | 0.19 ± 0.01                             |                           | 4.3 × 10 <sup>5</sup>                                              |
|               | ATP              | 54 ± 10                   | 0.17 ± 0.01                             |                           | 3.1 × 10 <sup>3</sup>                                              |
| AAC(2')-IIb   | Kasugamycin      | 44 ± 2                    | 2.95 ± 0.03                             |                           | 6.7 × 10 <sup>4</sup>                                              |
|               | Acetyl-CoA       | 13 ± 1                    | 2.9 ± 0.1                               |                           | 3.1 × 10 <sup>3</sup>                                              |
| AAC(6')-34    | Sisomicin        | 4.7 ± 0.4                 | 0.65 ± 0.06                             | 213 ± 25                  | 1.4 × 10 <sup>5</sup>                                              |
|               | Acetyl-CoA       | 220 ± 26                  | 0.39 ± 0.02                             |                           | 1.8 × 10 <sup>3</sup>                                              |

**Supplementary Table 7:**  $^1\text{H}$  and  $^{13}\text{C}$  NMR Data of capreomycin IA and *I-N-acetyl*-capreomycin IA in  $\text{D}_2\text{O}$ .

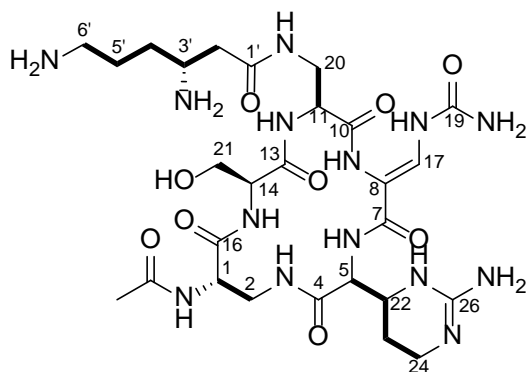

| No.                            | Capreomycin IA                 |                  | <i>I-N-acetyl</i> -Capreomycin IA |                  | $\Delta\text{ppm}(\delta\text{H})$ |
|--------------------------------|--------------------------------|------------------|-----------------------------------|------------------|------------------------------------|
|                                | $\delta\text{H}$               | $\delta\text{C}$ | $\delta\text{H}$                  | $\delta\text{C}$ |                                    |
| 1                              | 4.37 (dd, $J = 10.1, 5.3$ Hz)  | 50.9             | 4.60 (dd, $J = 10.5, 4.9$ Hz)     | 52.0             | 0.23                               |
| 2                              | 3.24 (dd, $J = 13.6, 10.1$ Hz) | 39.4             | 3.02-3.06 (m, overlapped)         | 40.3             | -0.20                              |
| 4                              | 4.09 (dd, $J = 13.6, 5.3$ Hz)  |                  | 3.82-3.88 (m, overlapped)         |                  | -0.24                              |
| 5                              | 5.01 (d, $J = 2.1$ Hz)         | 171.1            | 5.00 (d, $J = 2.1$ Hz)            | 171.0            | -0.01                              |
| 7                              |                                | 167.4            |                                   | 167.3            |                                    |
| 8                              |                                | 104.9            |                                   | 104.7            |                                    |
| 10                             |                                | 172.1            |                                   | 171.7            |                                    |
| 11                             | 4.41-4.54 (m, overlapped)      | 53.3             | 4.26-4.35 (m, overlapped)         | 53.4             | -0.17                              |
| 13                             |                                | 172.2            |                                   | 172.6            |                                    |
| 14                             | 4.81-4.84 (m, overlapped)      | 54.6             | 4.72-4.78 (m, overlapped)         | 54.2             | -0.07                              |
| 16                             |                                | 167.4            |                                   | 171.3            |                                    |
| 17                             | 8.03 (s)                       | 135.2            | 8.02 (s)                          | 135.2            | -0.01                              |
| 19                             |                                | 156.4            |                                   | 156.6            |                                    |
| 20                             | 3.73-3.78 (2H, m, overlapped)  | 38.0             | 3.70-3.82 (2H, m, overlapped)     | 37.9             | -0.03                              |
| 21                             | 3.82-3.88 (2H, m, overlapped)  | 62.3             | 3.69-3.89 (2H, m, overlapped)     | 62.4             | -0.01                              |
| 22                             | 4.47 (m)                       | 49.0             | 4.47 (m)                          | 49.1             | 0                                  |
| 23                             | 2.05-2.12 (m, overlapped)      | 22.7             | 2.04-2.10 (m, overlapped)         | 22.9             | -0.02                              |
| 24                             | 1.67-1.75 (m, overlapped)      | 36.1             | 1.63-1.71 (m, overlapped)         | 36.1             | -0.04                              |
| 26                             | 3.29-3.33 (m, overlapped)      | 154.4            | 3.30-3.33 (m, overlapped)         | 154.4            | -0.01                              |
| 1'                             |                                | 172.2            |                                   | 172.1            |                                    |
| 2'                             | 2.69 (dd, $J = 16.2, 8.3$ Hz)  | 36.6             | 2.61-2.68 (m, overlapped)         | 36.7             | -0.04                              |
| 3'                             | 2.80 (dd, $J = 16.2, 7.3$ Hz)  | 48.3             | 2.69-2.79 (m, overlapped)         | 48.2             | -0.04                              |
| 4'                             | 3.65-3.71 (m, overlapped)      | 29.0             | 3.61-3.69 (m, overlapped)         | 29.1             | -0.03                              |
| 5'                             | 1.75-1.87 (2H, m, overlapped)  | 22.7             | 1.73-1.82 (2H, m, overlapped)     | 22.9             | -0.03                              |
| 6'                             | 1.75-1.87 (2H, m, overlapped)  | 22.7             | 1.73-1.82 (2H, m, overlapped)     | 22.9             | -0.03                              |
|                                | 3.04-3.08 (2H, m, overlapped)  | 38.8             | 3.01-3.05 (2H, m, overlapped)     | 38.8             | -0.03                              |
| $\text{CH}_3\text{C}=\text{O}$ |                                |                  | 2.03 (s)                          | 21.5             |                                    |
| $\text{CH}_3\text{C}=\text{O}$ |                                |                  |                                   | 174.0            |                                    |

**Supplementary Table 8:**  $^1\text{H}$  and  $^{13}\text{C}$  NMR Data of capreomycin IB and *l*-*N*-acetyl-capreomycin IB in  $\text{D}_2\text{O}$ .

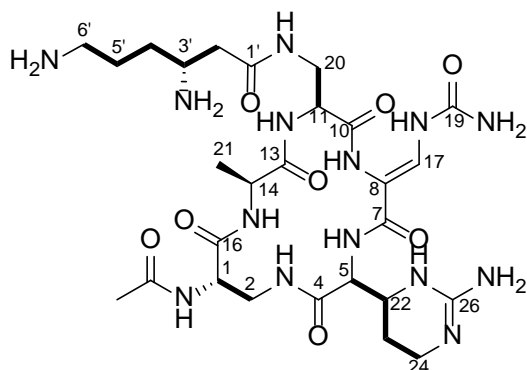

| No. | Capreomycin IB                |                  | <i>l</i> - <i>N</i> -acetyl-Capreomycin IB |                  | $\Delta\text{ppm}(\delta\text{H})$ |
|-----|-------------------------------|------------------|--------------------------------------------|------------------|------------------------------------|
|     | $\delta\text{H}$              | $\delta\text{C}$ | $\delta\text{H}$                           | $\delta\text{C}$ |                                    |
| 1   | 4.33 (dd, $J = 7.9, 5.1$ Hz)  | 51.1             | 4.56 (dd, $J = 9.1, 4.9$ Hz)               | 51.9             | 0.23                               |
| 2   | 3.31 (m, overlapped)          | 39.4             | 3.05-3.09 (m, overlapped)                  | 40.3             | -0.24                              |
| 4   | 4.12 (dd, $J = 14.1, 5.1$ Hz) |                  | 3.82-3.88 (m, overlapped)                  |                  | -0.27                              |
| 5   | 4.98 (d, $J = 2.1$ Hz)        | 171.1            | 4.97 (d, $J = 2.1$ Hz)                     | 171.0            | -0.01                              |
| 7   |                               | 167.1            |                                            | 167.2            |                                    |
| 8   |                               | 104.9            |                                            | 104.7            |                                    |
| 10  |                               | 172.0            |                                            | 171.9            |                                    |
| 11  | 4.41-4.54 (m, overlapped)     | 53.1             | 4.26-4.35 (m, overlapped)                  | 53.1             | -0.17                              |
| 13  |                               | 175.6            |                                            | 175.7            |                                    |
| 14  | 4.65 (t, $J = 7.3$ Hz)        | 48.7             | 4.64 (t, $J = 7.3$ Hz)                     | 48.1             | -0.01                              |
| 16  |                               | 166.7            |                                            | 171.3            |                                    |
| 17  | 8.03 (s)                      | 135.0            | 8.02 (s)                                   | 135.1            | -0.01                              |
| 19  |                               | 156.4            |                                            | 156.6            |                                    |
| 20  | 3.67-3.71 (m, overlapped)     | 37.9             | 3.64-3.69 (m, overlapped)                  | 37.8             | -0.02                              |
| 21  | 3.82-3.86 (m, overlapped)     | 18.3             | 3.84-3.88 (m, overlapped)                  | 18.3             | -0.02                              |
| 22  | 1.42 (3H, d, $J = 7.3$ Hz)    | 49.0             | 1.37 (3H, d, $J = 7.3$ Hz)                 | 48.9             | -0.05                              |
| 23  | 4.39 (m)                      | 22.8             | 4.41 (m)                                   | 22.8             | -0.02                              |
| 24  | 2.05-2.12 (m, overlapped)     | 36.1             | 2.04-2.10 (m, overlapped)                  | 36.1             | -0.02                              |
| 26  | 1.67-1.75 (m, overlapped)     | 154.4            | 1.63-1.71 (m, overlapped)                  | 154.4            | -0.04                              |
| 1'  | 3.29-3.33 (m, overlapped)     | 172.0            | 3.30-3.33 (m, overlapped)                  | 172.1            | -0.01                              |
| 2'  | 2.69 (dd, $J = 16.2, 8.3$ Hz) | 36.6             | 2.61-2.68 (m, overlapped)                  | 36.7             | -0.04                              |
| 3'  | 2.77 (dd, $J = 16.2, 5.1$ Hz) | 48.3             | 2.69-2.79 (m, overlapped)                  | 48.2             | -0.04                              |
| 4'  | 3.65-3.71 (m, overlapped)     | 29.0             | 3.61-3.69 (m, overlapped)                  | 29.1             | -0.03                              |
| 5'  | 1.75-1.87 (2H, m, overlapped) | 22.7             | 1.73-1.82 (2H, m, overlapped)              | 22.9             | -0.03                              |
| 6'  | 1.75-1.87 (2H, m, overlapped) | 38.8             | 3.01-3.05 (2H, m, overlapped)              | 38.8             | -0.03                              |
|     | 3.04-3.08 (2H, m, overlapped) |                  |                                            |                  |                                    |
|     |                               |                  | 2.02 (s)                                   | 21.5             |                                    |
|     |                               |                  |                                            | 174.0            |                                    |

**Supplementary Table 9:**  $^1\text{H}$  and  $^{13}\text{C}$  NMR spectra of clarithromycin and descladinose clarithromycin in DMSO- $d_6$ .

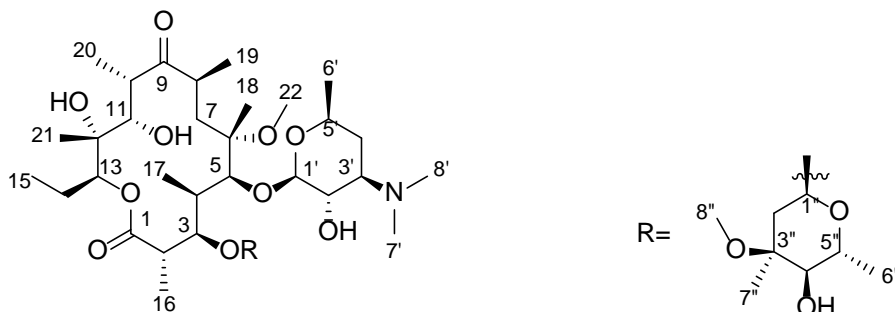

| No.        | Clarithromycin<br>(R=cladinose)    |                  | Descladinose clarithromycin<br>(R=H) |                  |
|------------|------------------------------------|------------------|--------------------------------------|------------------|
|            | $\delta\text{H}$                   | $\delta\text{C}$ | $\delta\text{H}$                     | $\delta\text{C}$ |
| 1          |                                    | 175.2            | -                                    | 174.8            |
| 2          | 2.8 (dt, J = 9.4, 7.2 Hz)          | 44.5             | 2.48 (m)                             | 44.5             |
| 3          | 3.63 (m)                           | 79.4             | 3.21 (m)                             | 75.6             |
| 3-OH       | -                                  | -                | 5.32 (d, J = 6.7 Hz)                 | -                |
| 4          | 1.84 (m)                           | 38.7             | 1.99 (m)                             | 36.1             |
| 5          | 3.62 (m)                           | 79.4             | 3.7 (d, J = 2.5 Hz)                  | 80.6             |
| 6          | -                                  | 72.6             | -                                    | 77.5             |
| 7          | 1.76 (m)                           | 38.5             | 1.8 (m)                              | 37.9             |
|            | 1.46 (m)                           |                  | 1.42 (m)                             |                  |
| 8          | 2.56 (m)                           | 39.9             | 2.47 (m)                             | 39.9             |
| 10         | 2.54 (m)                           | 43.7             | 2.43                                 | 43.7             |
| 11         | 3.63 (m)                           | 68.9             | 3.53 (m)                             | 67.4             |
| 12         | -                                  | 74.2             | -                                    | 74.2             |
| 13         | 5.05 (dd, J = 11.2, 2.3 Hz)        | 76.1             | 5.13 (dd, J = 11.2, 2.5 Hz)          | 75.6             |
| 14         | 1.83 (m)                           | 20.8             | 1.8 (m)                              | 21               |
|            | 1.36 (m)                           |                  | 1.34 (m)                             |                  |
| 15         | 0.72 (t, J = 7.4 Hz)               | 10.4             | 0.77 (t, J = 7.4 Hz)                 | 10.4             |
| 16         | 1.13 (d, J = 7.4 Hz)               | 15.8             | 1.1                                  | 15.6             |
| 17         | 1.01 (d, J = 6.5 Hz)               | 12.3             | 1.02 (d, J = 6.5 Hz)                 | 12.3             |
| 18         | 1.05 (s)                           | 18.6             | 1.05 (d, J = 6.3 Hz)                 | 17.7             |
| 19         | 1.11 (d, J = 7.4 Hz)               | 17.8             | 1.06 (d, J = 6.3 Hz)                 | 15.5             |
| 20         | 0.95 (d, J = 7.4 Hz)               | 8.4              | 0.95 (d, J = 7.4 Hz)                 | 8.4              |
| 21         | 1.2 (s)                            | 19.3             | 1.19 (s)                             | 20.7             |
| 22         | 3.26 (s)                           | 49.03            | 2.85 (s)                             | 49.8             |
| 1'         | 4.37 (dd, J = 12.7, 7.4 Hz)        | 102.3            | 4.57 (d, J = 6.7 Hz)                 | 100.4            |
| 2'         | 3.02 (ddd, J = 10.1, 7.3, 2.5 Hz)  | 70.5             | 3.33 (m)                             | 69.4             |
| 2'-OH      | 4.1 (s)                            |                  | 4.07 (s)                             |                  |
| 3'         | 2.41 (ddd, J = 12.3, 10.2, 3.9 Hz) | 65.5             | 3.3 (m)                              | 64.7             |
| 4' (proS)  | 1.07 (m)                           | 30.5             | 1.44 (m)                             | 30.48            |
| 4' (proR)  | 1.58 (m)                           |                  | 1.91 (m)                             |                  |
| 5'         | 3.19 (m)                           | 69.6             | 3.68 (m)                             | 67.83            |
| 6'         | 1.07 (m)                           | 22               | 1.03 (m)                             | 19.5             |
| 7',8'      | 2.21 (s)                           | 40.7             | 2.68 (s)                             | 40.7             |
|            |                                    |                  | 2.73 (s)                             | 37.5             |
| 1''        | 4.77 (d, J = 5 Hz)                 | 95.8             |                                      |                  |
| 2'' (proS) | 1.53 (m)                           | 34.8             |                                      |                  |
| 2'' (proR) | 2.28 (d, J = 15 Hz)                |                  |                                      |                  |
| 3''        |                                    | 72.5             |                                      |                  |
| 4''        | 2.92 (dd, J = 9.4, 7.3 Hz)         | 77.5             |                                      |                  |
| 5''        | 4.03 (m)                           | 66.8             |                                      |                  |
| 6''        | 1.13 (brs)                         | 20.8             |                                      |                  |
| 7''        | 1.09 (s)                           | 21.5             |                                      |                  |
| 8''        | 3.21 (s)                           | 48.8             |                                      |                  |

**Supplementary Table 10:** Effect of *llmA* expression on susceptibility to antibiotics that target the peptidyltransferase center.

| <b>Antibiotic</b> | <b><i>E. coli</i> BL21(DE3) pET11a MIC<br/>(<math>\mu\text{g}/\text{mL}</math>)</b> | <b><i>E. coli</i> BL21(DE3) pET11a-<i>llmA</i> MIC<br/>(<math>\mu\text{g}/\text{mL}</math>)</b> |
|-------------------|-------------------------------------------------------------------------------------|-------------------------------------------------------------------------------------------------|
| Linezolid         | 16                                                                                  | 2                                                                                               |
| Flopristin        | 16                                                                                  | 16                                                                                              |
| Clindamycin       | 32-64                                                                               | 1024                                                                                            |
| Chloramphenicol   | 4                                                                                   | 2                                                                                               |
| Tiamulin          | 128                                                                                 | 32                                                                                              |
| Erythromycin      | 32                                                                                  | 32                                                                                              |
| Telithromycin     | 4                                                                                   | 4                                                                                               |

**Supplementary Table 11:** List of *Paenibacillus* strains and assembly IDs used for generating the *Paenibacillus* species tree.

| Strain                                    | Assembly Accession | Strain                                  | Assembly Accession |
|-------------------------------------------|--------------------|-----------------------------------------|--------------------|
| <i>Paenibacillus alvei</i> DSM 29         | GCF 000293805.1    | <i>Paenibacillus sabiniae</i> T27       | GCF 000612505.1    |
| <i>Paenibacillus assamensis</i> DSM       | GCF 000422445.1    | <i>Paenibacillus senegalensis</i> JC66  | GCF 000285515.1    |
| <i>Paenibacillus borealis</i>             | GCF 000758665.1    | <i>Paenibacillus sonchi</i> X19-5       | GCF 000316285.1    |
| <i>Paenibacillus chitinolyticus</i> NBRC  | GCF 000739915.1    | <i>Paenibacillus</i> sp. 1-18           | GCF 000520755.1    |
| <i>Paenibacillus curdolanolyticus</i> YK9 | GCF 000179615.1    | <i>Paenibacillus</i> sp. 1-49           | GCF 000520815.1    |
| <i>Paenibacillus daejeonensis</i> DSM     | GCF 000378385.1    | <i>Paenibacillus</i> sp. A9             | GCF 000346635.1    |
| <i>Paenibacillus dauci</i>                | GCF 000971985.1    | <i>Paenibacillus</i> sp. FSL H7-0357    | GCF 000758525.1    |
| <i>Paenibacillus durus</i> ATCC 35681     | GCF 000993825.1    | <i>Paenibacillus</i> sp. FSL H7-0737    | GCF 000758545.1    |
| <i>Paenibacillus ehimensis</i> A2         | GCF 000612225.1    | <i>Paenibacillus</i> sp. FSL H7-689     | GCF 000517905.1    |
| <i>Paenibacillus elqii</i> B69            | GCF 000213315.1    | <i>Paenibacillus</i> sp. FSL H8-237     | GCF 000517925.1    |
| <i>Paenibacillus fonticola</i> DSM        | GCF 000381905.1    | <i>Paenibacillus</i> sp. FSL H8-457     | GCF 000517945.1    |
| <i>Paenibacillus forsythiae</i> T98       | GCF 000520735.1    | <i>Paenibacillus</i> sp. FSL P4-0081    | GCF 000758565.1    |
| <i>Paenibacillus ginsengihumi</i> DSM     | GCF 000380965.1    | <i>Paenibacillus</i> sp. FSL R5-0345    | GCF 000758585.1    |
| <i>Paenibacillus graminis</i>             | GCF 000758705.1    | <i>Paenibacillus</i> sp. FSL R5-0912    | GCF 000758605.1    |
| <i>Paenibacillus harenae</i> DSM          | GCF 000422465.1    | <i>Paenibacillus</i> sp. FSL R5-192     | GCF 000517845.1    |
| <i>Paenibacillus lactis</i> 154           | GCF 000230915.1    | <i>Paenibacillus</i> sp. FSL R5-808     | GCF 000517885.1    |
| <i>Paenibacillus macerans</i>             | GCF 000746875.1    | <i>Paenibacillus</i> sp. FSL R7-0273    | GCF 000758625.1    |
| <i>Paenibacillus massiliensis</i> T7      | GCF 000520695.1    | <i>Paenibacillus</i> sp. FSL R7-0331    | GCF 000758645.1    |
| <i>Paenibacillus mucilaginosus</i> K02    | GCF 000258535.2    | <i>Paenibacillus</i> sp. FSL R7-269     | GCF 000517865.1    |
| <i>Paenibacillus mucilaginosus</i>        | GCF 000218915.1    | <i>Paenibacillus</i> sp. FSL R7-277     | GCF 000517965.1    |
| <i>Paenibacillus odorifer</i>             | GCF 000758725.1    | <i>Paenibacillus</i> sp. G4             | GCF 000723885.1    |
| <i>Paenibacillus panacisoli</i> DSM       | GCF 000426545.1    | <i>Paenibacillus</i> sp. HGF5           | GCF 000204455.1    |
| <i>Paenibacillus pasadenensis</i> DSM     | GCF 000422485.1    | <i>Paenibacillus</i> sp. HGH0039        | GCF 000411255.1    |
| <i>Paenibacillus peoriae</i> KCTC 3763    | GCF 000236805.1    | <i>Paenibacillus</i> sp. HW567          | GCF 000374185.1    |
| <i>Paenibacillus pinihumi</i> DSM         | GCF 000422505.1    | <i>Paenibacillus</i> sp. IHB B 3415     | GCF 000802655.2    |
| <i>Paenibacillus polymyxa</i>             | GCF 000785455.1    | <i>Paenibacillus</i> sp. JDR-2          | GCF 000023585.1    |
| <i>Paenibacillus polymyxa</i> 1-43        | GCF 000520795.1    | <i>Paenibacillus</i> sp. MAEPY1         | GCF 000499305.1    |
| <i>Paenibacillus polymyxa</i> A18         | GCF 000809185.1    | <i>Paenibacillus</i> sp. MAEPY2         | GCF 000499205.1    |
| <i>Paenibacillus polymyxa</i> ATCC 842    | GCF 000217775.1    | <i>Paenibacillus</i> sp. MSt1           | GCF 000722545.1    |
| <i>Paenibacillus polymyxa</i> CR1         | GCF 000507205.3    | <i>Paenibacillus</i> sp. oral taxon 786 | GCF 000159955.1    |
| <i>Paenibacillus polymyxa</i> E681        | GCF 000146875.1    | <i>Paenibacillus</i> sp. OSY-SE         | GCF 000283315.1    |
| <i>Paenibacillus polymyxa</i> M1          | GCF 000237325.1    | <i>Paenibacillus</i> sp. PAMC 26794     | GCF 000316035.1    |
| <i>Paenibacillus polymyxa</i> OSY-DF      | GCF 000265445.1    | <i>Paenibacillus</i> sp. UNC451MF       | GCF 000686845.1    |
| <i>Paenibacillus polymyxa</i> SC2         | GCF 000164985.1    | <i>Paenibacillus</i> sp. UNCCL52        | GCF 000686825.1    |
| <i>Paenibacillus polymyxa</i> SQR-21      | GCF 000597985.1    | <i>Paenibacillus</i> sp. URHA0014       | GCF 000620565.1    |
| <i>Paenibacillus riograndensis</i> SBR5   | GCF 000981585.1    | <i>Paenibacillus</i> sp. Y412MC10       | GCF 000024685.1    |
| <i>Paenibacillus terrigena</i> DSM        | GCF 000374845.1    | <i>Paenibacillus stellifer</i>          | GCF 000758685.1    |
| <i>Paenibacillus vortex</i> V453          | GCF 000193415.1    | <i>Paenibacillus taiwanensis</i> DSM    | GCF 000425125.1    |
| <i>Paenibacillus wynnii</i>               | GCF 000757885.1    | <i>Paenibacillus terrae</i>             | GCF 000943545.1    |
| <i>Paenibacillus terrae</i> HPL-003       | GCF 000235585.1    |                                         |                    |



**Supplementary Table 12:**  
Oligonucleotides used in  
this study.

| Gene                                         | Vector                             | Primer Direction | Restriction Site | Primer (5' to 3')                                |
|----------------------------------------------|------------------------------------|------------------|------------------|--------------------------------------------------|
| <i>mphI</i>                                  | pET22a                             | Forward          | NdeI             | ATTAGTcatatgACAATAGCAAAACCAAATGATGATTATACACAAGTG |
|                                              |                                    | Reverse          | XhoI             | TCCTTctcgagCTCCGTCAAACCCAGAGCATTCC               |
| <i>vatI</i>                                  | pET28a                             | Forward          | NheI             | TACTGAgctagcATGACAGGACCGAATCC                    |
|                                              |                                    | Reverse          | BamHI            | TCAGTAggatccCTAATTTGTCTCATTTTTCTAAGC             |
| <i>vgbC</i>                                  | pET28a                             | Forward          | NheI             | AGACTgctagcATGCAGATCGCCGCACAGGAGTACAAGACAGC      |
|                                              |                                    | Reverse          | XhoI             | AATActcgagTTAATACTGAATCGTAAACCGGCCG              |
| <i>rphB</i>                                  | pET28a                             | Forward          | NheI             | TACTGAgctagcATGCGTTCGTTGGTCTCG                   |
|                                              |                                    | Reverse          | EcoRI            | TCAGTAgaatcCTATGACAATATTTCAATATAGCCTTCGGACC      |
| <i>cpaA</i>                                  | pET28a                             | Forward          | NheI             | TACTGAgctagcCTTCGTATCACGGCCATGACC                |
|                                              |                                    | Reverse          | BamHI            | TCAGTAggatccTTACAATCCGGAGCCCGG                   |
| <i>llmA</i>                                  | pET11a                             | Forward          | NheI             | TACTGAgctagcATGTATGTAGCTCAGGATTGGC               |
|                                              |                                    | Reverse          | EcoRI            | TCAGTAgaatcTCAGGACTCCCATCGACC                    |
| <i>ileRS</i>                                 | pET11a                             | Forward          | NheI             | TACTGAgctagcATGAACAGAGTAGACGTCAAGGAGAAGGC        |
|                                              |                                    | Reverse          | BamHI            | TCAGTAggatccTTAGGCGATGTGGATGCCG                  |
| <i>bahA</i>                                  | pET11a                             | Forward          | NheI             | TACTGAgctagcGAAATACACAAAGAGAAAAGAAAAAGGCGC       |
|                                              |                                    | Reverse          | BamHI            | TCAGTAggatccTTAAGATCGAATGCCAACATCACG             |
| <i>bahA</i> (C-terminal<br>hydrolase domain) | pET11a<br>(sub-cloned from pET11a) | Forward          | NheI             | TACTGAgctagcAACAATCCGGCCGAACAAGG                 |
|                                              |                                    | Reverse          | BamHI            | TCAGTAggatccTTAAGATCGAATGCCAACATCACG             |
| <i>bahA</i> (Transmembrane<br>domain)        | pET21a<br>pET11a                   | Forward          | XbaI             | ATTCCCtctagaAATAATTTGTTTAACTTTAAGAAGG            |
|                                              |                                    | Reverse          | XhoI             | TCAGTActcgagAGATCGAATGCCAACATCACG                |
| <i>tetAB(48)</i>                             | pUC19                              | Forward          | NheI             | TACTGAgctagcGAAATACACAAAGAGAAAAGAAAAAGGCGC       |
|                                              |                                    | Reverse          | BamHI            | TCAGTAggatccCGTCGAGTCTTCATATCGGGTTG              |
| <i>aac(2)-IIb</i>                            | pUC19                              | Forward          | KpnI             | TACTAggtaccTCCATGGAGATGTGTTCCGAGG                |
|                                              |                                    | Reverse          | XbaI             | TAGTAtctagaGACAGGATGGGTAACGCCG                   |
| <i>aac(6)-34</i>                             | pET21a/pET28a                      | Forward          | NheI             | TACTGAgctagcATGAACCATAGGAAAGGTAACG               |
|                                              |                                    | Reverse          | BamHI            | TCAGTAggatccTCAACTGATCGTGAAGTTAACTCC             |
| <i>taeA</i>                                  | pET21a/pET28a                      | Forward          | NheI             | TACTGAgctagcATGAGAATTGGGGATCTAATAAGGG            |
|                                              |                                    | Reverse          | BamHI            | TCAGTAggatccTTACTTTGCTCTGCCCCG                   |
| <i>catU</i>                                  | pUC19                              | Forward          | KpnI             | TACTAggtaccCGGAGTTAGGCAGCCTTAGCC                 |
|                                              |                                    | Reverse          | XbaI             | TAGTAtctagaACTAACAAGGGGGCTCCCCG                  |
| <i>catU</i>                                  | pET28a                             | Forward          | NdeI             | TGCATGCAcatatgAAGTTTCACATTATTAATGTTGAAGAGTGG     |
|                                              |                                    | Reverse          | XhoI             | TGTAATCctcgagAGTTAACCAATCTTCAAAGAATCCGCC         |
